# Supplementary material for: Transcriptome and metabolome analyses of cold and darkness-induced pellicle cysts of Scrippsiella trochoidea
Source: BMC Genomics. 2021 Jul 10;22:526. doi: 10.1186/s12864-021-07840-7 (PMC8272339; doi:10.1186/s12864-021-07840-7)
Supplement: Supplementary file 5 — Additional file 5: Supplementary Table S5 KEGG pathway enrichment of differentially expressed genes. [file 12864_2021_7840_MOESM5_ESM.xlsx]

## Sheet: CK vs. D5. KEGG.enrichment
Additional file 5 KEGG pathway enrichment for all DEGs in the comparisons of control (CK) and cold and darkness treatment for five hours (D5)
#Pathway	ko_ID	DEG_in_Pathway (191)	P-value	Gene_id
Ribosome	ko03010	99	1.5929e-66	c103601.graph_c0;c105007.graph_c0;c105020.graph_c0;c105025.graph_c0;c105051.graph_c0;c106064.graph_c0;c106620.graph_c0;c107282.graph_c0;c108312.graph_c0;c112141.graph_c0;c114122.graph_c0;c114329.graph_c0;c114578.graph_c0;c114928.graph_c0;c116436.graph_c0;c117022.graph_c0;c117156.graph_c0;c117679.graph_c0;c118096.graph_c0;c119451.graph_c0;c120016.graph_c0;c120560.graph_c0;c121044.graph_c0;c125043.…
Proteasome	ko03050	7	0.00212133	c66975.graph_c0;c74098.graph_c0;c74172.graph_c0;c78483.graph_c0;c89356.graph_c0;c89708.graph_c0;c93134.graph_c0
Oxidative phosphorylation	ko00190	11	0.00372186	c104083.graph_c0;c112077.graph_c0;c129590.graph_c0;c39330.graph_c0;c46405.graph_c0;c74176.graph_c0;c87546.graph_c0;c88826.graph_c0;c91459.graph_c0;c94630.graph_c0;c99135.graph_c0
Propanoate metabolism	ko00640	5	0.0498466	c100105.graph_c0;c110283.graph_c0;c65287.graph_c0;c79572.graph_c0;c92564.graph_c0
Glycosphingolipid biosynthesis - globo series	ko00603	3	0.0778787	c100070.graph_c0;c100502.graph_c0;c97500.graph_c0
Citrate cycle (TCA cycle)	ko00020	6	0.0847271	c110283.graph_c0;c115442.graph_c0;c86726.graph_c0;c86726.graph_c1;c92043.graph_c0;c92564.graph_c0
Valine, leucine and isoleucine degradation	ko00280	5	0.101685	c100105.graph_c0;c65287.graph_c0;c79572.graph_c0;c86441.graph_c0;c92564.graph_c0
Glycosphingolipid biosynthesis - ganglio series	ko00604	2	0.135478	c100070.graph_c0;c97500.graph_c0
Glycosaminoglycan degradation	ko00531	2	0.16073	c100070.graph_c0;c97500.graph_c0
Steroid biosynthesis	ko00100	3	0.210049	c66763.graph_c0;c95543.graph_c0;c97615.graph_c0
Glyoxylate and dicarboxylate metabolism	ko00630	6	0.244949	c100105.graph_c0;c115442.graph_c0;c65287.graph_c0;c86726.graph_c0;c86726.graph_c1;c92564.graph_c0
Other glycan degradation	ko00511	2	0.294234	c100070.graph_c0;c97500.graph_c0
Biosynthesis of unsaturated fatty acids	ko01040	2	0.307703	c67979.graph_c0;c95925.graph_c0
Photosynthesis	ko00195	3	0.317754	c112077.graph_c0;c128928.graph_c0;c129590.graph_c0
Sphingolipid metabolism	ko00600	3	0.347675	c100502.graph_c0;c101486.graph_c0;c87941.graph_c0
Monobactam biosynthesis	ko00261	1	0.356273	c102508.graph_c0
Sulfur metabolism	ko00920	2	0.374037	c102508.graph_c0;c85631.graph_c0
2-Oxocarboxylic acid metabolism	ko01210	3	0.397191	c86726.graph_c0;c86726.graph_c1;c98246.graph_c0
Carbon metabolism	ko01200	13	0.465834	c100105.graph_c0;c110283.graph_c0;c115442.graph_c0;c29093.graph_c0;c63370.graph_c0;c65287.graph_c0;c79572.graph_c0;c81666.graph_c1;c86726.graph_c0;c86726.graph_c1;c92043.graph_c0;c92564.graph_c0;c98246.graph_c0
Cyanoamino acid metabolism	ko00460	1	0.537685	c98032.graph_c0
Carbon fixation in photosynthetic organisms	ko00710	4	0.542057	c115442.graph_c0;c63370.graph_c0;c81666.graph_c1;c98246.graph_c0
Phenylalanine metabolism	ko00360	1	0.554396	c43855.graph_c0
Butanoate metabolism	ko00650	1	0.570506	c43855.graph_c0
Phenylpropanoid biosynthesis	ko00940	1	0.601009	c98032.graph_c0
beta-Alanine metabolism	ko00410	2	0.6145	c79572.graph_c0;c98024.graph_c6
Ribosome biogenesis in eukaryotes	ko03008	3	0.650125	c100904.graph_c2;c28706.graph_c1;c84239.graph_c0
Terpenoid backbone biosynthesis	ko00900	2	0.668962	c101185.graph_c0;c95369.graph_c0
Ether lipid metabolism	ko00565	1	0.713689	c94125.graph_c0
Selenocompound metabolism	ko00450	1	0.724063	c102508.graph_c0
Pentose and glucuronate interconversions	ko00040	1	0.724063	c83178.graph_c0
Lysine degradation	ko00310	1	0.752997	c94664.graph_c0
Fructose and mannose metabolism	ko00051	2	0.771984	c63370.graph_c0;c81666.graph_c1
Arginine biosynthesis	ko00220	1	0.77891	c98246.graph_c0
Pyruvate metabolism	ko00620	3	0.780218	c115442.graph_c0;c92043.graph_c0;c92564.graph_c0
Inositol phosphate metabolism	ko00562	3	0.780218	c63370.graph_c0;c79572.graph_c0;c94125.graph_c0
Galactose metabolism	ko00052	2	0.784183	c100502.graph_c0;c103649.graph_c0
Tryptophan metabolism	ko00380	1	0.794665	c94664.graph_c0
Tyrosine metabolism	ko00350	1	0.802118	c99420.graph_c3
Amino sugar and nucleotide sugar metabolism	ko00520	3	0.804597	c100070.graph_c0;c84267.graph_c0;c97500.graph_c0
Fatty acid degradation	ko00071	1	0.835535	c94664.graph_c0
Glycolysis / Gluconeogenesis	ko00010	4	0.852534	c63370.graph_c0;c81666.graph_c1;c92043.graph_c0;c92564.graph_c0
Ascorbate and aldarate metabolism	ko00053	1	0.852824	c105236.graph_c0
Phagosome	ko04145	2	0.870503	c36308.graph_c0;c48191.graph_c0
Regulation of autophagy	ko04140	2	0.877839	c81191.graph_c0;c86695.graph_c0
Plant hormone signal transduction	ko04075	1	0.886453	c75020.graph_c0
Porphyrin and chlorophyll metabolism	ko00860	1	0.909117	c99238.graph_c0
Arginine and proline metabolism	ko00330	2	0.914396	c101556.graph_c0;c98024.graph_c6
Alanine, aspartate and glutamate metabolism	ko00250	1	0.921664	c98246.graph_c0
Spliceosome	ko03040	7	0.922767	c124145.graph_c0;c20085.graph_c0;c28706.graph_c1;c32093.graph_c1;c32558.graph_c0;c98753.graph_c0;c99806.graph_c1
Starch and sucrose metabolism	ko00500	3	0.923288	c103649.graph_c0;c93182.graph_c0;c98032.graph_c0
Glutathione metabolism	ko00480	2	0.924115	c101556.graph_c0;c105236.graph_c0
Fatty acid metabolism	ko01212	2	0.944075	c67979.graph_c0;c95925.graph_c0
Endocytosis	ko04144	4	0.946929	c124145.graph_c0;c47162.graph_c0;c86684.graph_c0;c99806.graph_c1
RNA transport	ko03013	5	0.950803	c54104.graph_c0;c80275.graph_c1;c84239.graph_c0;c84528.graph_c0;c93719.graph_c0
ABC transporters	ko02010	1	0.951703	c117555.graph_c0
Aminoacyl-tRNA biosynthesis	ko00970	1	0.958392	c94050.graph_c0
Pentose phosphate pathway	ko00030	1	0.962796	c81666.graph_c1
Glycerolipid metabolism	ko00561	1	0.97026	c100502.graph_c0
Glycine, serine and threonine metabolism	ko00260	1	0.971351	c92564.graph_c0
Purine metabolism	ko00230	4	0.980347	c102508.graph_c0;c115293.graph_c0;c72576.graph_c0;c83286.graph_c0
Cysteine and methionine metabolism	ko00270	1	0.981012	c115442.graph_c0
Glycerophospholipid metabolism	ko00564	1	0.98171	c94125.graph_c0
Protein processing in endoplasmic reticulum	ko04141	7	0.984019	c124145.graph_c0;c19204.graph_c0;c48876.graph_c1;c75249.graph_c0;c82731.graph_c0;c91926.graph_c0;c99806.graph_c1
Ubiquitin mediated proteolysis	ko04120	2	0.98704	c19204.graph_c0;c75249.graph_c0
Biosynthesis of amino acids	ko01230	5	0.9925	c63370.graph_c0;c81666.graph_c1;c86726.graph_c0;c86726.graph_c1;c98246.graph_c0
Phosphatidylinositol signaling system	ko04070	1	0.998643	c86149.graph_c0
mRNA surveillance pathway	ko03015	1	0.998789	c80275.graph_c1
RNA degradation	ko03018	1	0.999289	c80275.graph_c1
Plant-pathogen interaction	ko04626	2	0.999966	c66508.graph_c2;c86149.graph_c0

## Sheet: CK vs. PC. KEGG.enrichment
Additional file 5 KEGG pathway enrichment for all DEGs in the comparisons of control (CK) and pellicle cysts (PC)
#Pathway	ko_ID	DEG_in_Pathway (139)	P-value	Gene_id
Protein processing in endoplasmic reticulum	ko04141	20	0.00149824	c100432.graph_c1;c101114.graph_c0;c112308.graph_c0;c116549.graph_c0;c25791.graph_c0;c29007.graph_c0;c37826.graph_c0;c42510.graph_c0;c45848.graph_c1;c46086.graph_c0;c60480.graph_c0;c79089.graph_c0;c83033.graph_c0;c88644.graph_c0;c89464.graph_c0;c92565.graph_c1;c97175.graph_c1;c98567.graph_c0;c98976.graph_c0;c99300.graph_c0
Riboflavin metabolism	ko00740	4	0.00157746	c114214.graph_c0;c29511.graph_c0;c29511.graph_c1;c58106.graph_c0
Photosynthesis	ko00195	6	0.00292984	c100671.graph_c0;c102178.graph_c0;c102507.graph_c0;c103228.graph_c0;c105570.graph_c0;c112077.graph_c0
Valine, leucine and isoleucine degradation	ko00280	6	0.00899026	c65287.graph_c0;c69354.graph_c0;c79572.graph_c0;c95127.graph_c0;c95718.graph_c1;c99473.graph_c0
Propanoate metabolism	ko00640	5	0.0150424	c65287.graph_c0;c72766.graph_c0;c79572.graph_c0;c95718.graph_c1;c99473.graph_c0
Ribosome	ko03010	17	0.0174435	c101700.graph_c0;c106064.graph_c0;c112141.graph_c0;c114329.graph_c0;c118096.graph_c0;c27356.graph_c0;c30826.graph_c0;c43323.graph_c0;c45339.graph_c0;c53479.graph_c0;c57329.graph_c0;c61787.graph_c0;c62129.graph_c0;c66621.graph_c0;c77867.graph_c0;c79327.graph_c2;c79668.graph_c0
Fatty acid degradation	ko00071	4	0.0385169	c69354.graph_c0;c91664.graph_c0;c95127.graph_c0;c95718.graph_c1
Thiamine metabolism	ko00730	2	0.0440123	c86576.graph_c0;c87227.graph_c0
Biosynthesis of unsaturated fatty acids	ko01040	3	0.0463689	c67979.graph_c0;c69354.graph_c0;c83863.graph_c0
RNA transport	ko03013	11	0.0609607	c103166.graph_c1;c103903.graph_c0;c109036.graph_c0;c29710.graph_c0;c78650.graph_c0;c79737.graph_c0;c80275.graph_c1;c91896.graph_c1;c93719.graph_c0;c95846.graph_c0;c98431.graph_c0
Plant hormone signal transduction	ko04075	4	0.0679194	c102155.graph_c0;c27465.graph_c0;c86798.graph_c0;c95185.graph_c0
Lysine degradation	ko00310	3	0.0763666	c77618.graph_c1;c95127.graph_c0;c95718.graph_c1
alpha-Linolenic acid metabolism	ko00592	2	0.0952775	c69354.graph_c0;c91664.graph_c0
Tyrosine metabolism	ko00350	3	0.107305	c102575.graph_c0;c91664.graph_c0;c93612.graph_c0
Ascorbate and aldarate metabolism	ko00053	3	0.154685	c43765.graph_c0;c68127.graph_c0;c95127.graph_c0
beta-Alanine metabolism	ko00410	3	0.187078	c79572.graph_c0;c95127.graph_c0;c99473.graph_c0
Synthesis and degradation of ketone bodies	ko00072	1	0.191481	c95718.graph_c1
Ether lipid metabolism	ko00565	2	0.223454	c100919.graph_c0;c26596.graph_c0
Fatty acid metabolism	ko01212	5	0.229481	c67979.graph_c0;c69354.graph_c0;c72766.graph_c0;c83863.graph_c0;c95718.graph_c1
N-Glycan biosynthesis	ko00510	3	0.256142	c108322.graph_c0;c21177.graph_c0;c93656.graph_c0
Regulation of autophagy	ko04140	4	0.260587	c104958.graph_c0;c81191.graph_c0;c85892.graph_c1;c99889.graph_c0
Glycosylphosphatidylinositol(GPI)-anchor biosynthesis	ko00563	1	0.292176	c111817.graph_c0
AGE-RAGE signaling pathway in diabetic complications	ko04933	1	0.310768	c102474.graph_c1
Tryptophan metabolism	ko00380	2	0.311473	c95127.graph_c0;c95718.graph_c1
Arginine and proline metabolism	ko00330	4	0.331673	c118916.graph_c0;c43286.graph_c0;c46595.graph_c0;c95127.graph_c0
Tropane, piperidine and pyridine alkaloid biosynthesis	ko00960	1	0.363684	c85698.graph_c0
Glyoxylate and dicarboxylate metabolism	ko00630	4	0.367736	c104852.graph_c0;c65287.graph_c0;c68531.graph_c0;c95718.graph_c1
Oxidative phosphorylation	ko00190	4	0.385755	c103228.graph_c0;c112077.graph_c0;c120591.graph_c0;c27234.graph_c0
Aminoacyl-tRNA biosynthesis	ko00970	3	0.392941	c45192.graph_c0;c83276.graph_c0;c93434.graph_c1
Fatty acid elongation	ko00062	1	0.428014	c83863.graph_c0
Phenylalanine metabolism	ko00360	1	0.44306	c93612.graph_c0
Butanoate metabolism	ko00650	1	0.457714	c95718.graph_c1
Peroxisome	ko04146	3	0.490111	c24406.graph_c0;c69354.graph_c0;c90613.graph_c0
Nitrogen metabolism	ko00910	2	0.503623	c104852.graph_c0;c71420.graph_c0
Cysteine and methionine metabolism	ko00270	3	0.535855	c103941.graph_c1;c28962.graph_c0;c82492.graph_c0
Carbon fixation in photosynthetic organisms	ko00710	3	0.535855	c106574.graph_c0;c116715.graph_c0;c67647.graph_c0
Glycerophospholipid metabolism	ko00564	3	0.542202	c103702.graph_c0;c87507.graph_c0;c87944.graph_c0
Carbon metabolism	ko01200	9	0.548704	c106574.graph_c0;c116715.graph_c0;c65287.graph_c0;c67647.graph_c0;c68531.graph_c0;c77618.graph_c1;c79572.graph_c0;c95718.graph_c1;c99473.graph_c0
Pyruvate metabolism	ko00620	3	0.573181	c72766.graph_c0;c95127.graph_c0;c95718.graph_c1
Inositol phosphate metabolism	ko00562	3	0.573181	c116721.graph_c0;c79572.graph_c0;c99473.graph_c0
Glutathione metabolism	ko00480	3	0.585208	c61045.graph_c0;c68127.graph_c0;c83102.graph_c0
Nucleotide excision repair	ko03420	2	0.589867	c116549.graph_c0;c29007.graph_c0
Pentose and glucuronate interconversions	ko00040	1	0.60636	c95127.graph_c0
RNA polymerase	ko03020	1	0.60636	c117893.graph_c0
Selenocompound metabolism	ko00450	1	0.60636	c82492.graph_c0
Glycolysis / Gluconeogenesis	ko00010	4	0.633863	c106574.graph_c0;c67647.graph_c0;c91664.graph_c0;c95127.graph_c0
One carbon pool by folate	ko00670	1	0.636699	c82492.graph_c0
Endocytosis	ko04144	5	0.642233	c116721.graph_c0;c65055.graph_c1;c69734.graph_c0;c92565.graph_c1;c98567.graph_c0
Citrate cycle (TCA cycle)	ko00020	2	0.658263	c77618.graph_c1;c95653.graph_c0
Histidine metabolism	ko00340	1	0.68219	c95127.graph_c0
Phosphatidylinositol signaling system	ko04070	4	0.688348	c101646.graph_c8;c116721.graph_c0;c45495.graph_c0;c87507.graph_c0
mRNA surveillance pathway	ko03015	4	0.701049	c21027.graph_c0;c79737.graph_c0;c80275.graph_c1;c91896.graph_c1
Glycerolipid metabolism	ko00561	2	0.717299	c87944.graph_c0;c95127.graph_c0
Phagosome	ko04145	2	0.728033	c120591.graph_c0;c41308.graph_c0
Photosynthesis - antenna proteins	ko00196	1	0.756891	c51452.graph_c0
Purine metabolism	ko00230	5	0.780463	c117893.graph_c0;c83286.graph_c0;c84482.graph_c1;c86576.graph_c0;c87227.graph_c0
Protein export	ko03060	1	0.793046	c112308.graph_c0
Base excision repair	ko03410	1	0.793046	c95354.graph_c1
Plant-pathogen interaction	ko04626	7	0.802289	c45013.graph_c1;c83033.graph_c0;c84601.graph_c2;c86473.graph_c0;c89177.graph_c1;c96692.graph_c0;c97175.graph_c1
Terpenoid backbone biosynthesis	ko00900	1	0.814129	c95718.graph_c1
Fatty acid biosynthesis	ko00061	1	0.885507	c72766.graph_c0
ABC transporters	ko02010	1	0.888553	c101744.graph_c0
RNA degradation	ko03018	3	0.889925	c70235.graph_c0;c80275.graph_c1;c91896.graph_c1
Pentose phosphate pathway	ko00030	1	0.907739	c116715.graph_c0
Ribosome biogenesis in eukaryotes	ko03008	1	0.914922	c109036.graph_c0
Ubiquitin mediated proteolysis	ko04120	2	0.943021	c119232.graph_c0;c77189.graph_c0
Amino sugar and nucleotide sugar metabolism	ko00520	1	0.957936	c116909.graph_c0
Biosynthesis of amino acids	ko01230	4	0.974028	c106574.graph_c0;c116715.graph_c0;c67647.graph_c0;c82492.graph_c0
Pyrimidine metabolism	ko00240	1	0.983795	c117893.graph_c0
Spliceosome	ko03040	3	0.987423	c92565.graph_c1;c98567.graph_c0;c98753.graph_c0
