# Supplementary material for: Transcriptome and metabolome analyses of cold and darkness-induced pellicle cysts of Scrippsiella trochoidea
Source: BMC Genomics. 2021 Jul 10;22:526. doi: 10.1186/s12864-021-07840-7 (PMC8272339; doi:10.1186/s12864-021-07840-7)
Supplement: Supplementary file 6 — Additional file 6: Supplementary Table S6 Differentially expressed genes related to signal transduction during encystment. [file 12864_2021_7840_MOESM6_ESM.xlsx]

## Sheet: Sheet1
Additional file 6 Differentially expressed genes related to signal transduction during encystment
#ID	CK1_FPKM	CK2_FPKM	CK3_FPKM	D5-1_FPKM	D5-2_FPKM	D5-3_FPKM	PC1_FPKM	PC2_FPKM	PC3_FPKM	CK1_CK2_CK3_vs_D5-1_D5-2_D5-3_DESeq2_FDR	CK1_CK2_CK3_vs_D5-1_D5-2_D5-3_DESeq2_log2FC	CK1_CK2_CK3_vs_D5-1_D5-2_D5-3_DESeq2_(FDR_0.01_FC_2)_regulated	CK1_CK2_CK3_vs_PC1_PC2_PC3_DESeq2_FDR	CK1_CK2_CK3_vs_PC1_PC2_PC3_DESeq2_log2FC	CK1_CK2_CK3_vs_PC1_PC2_PC3_DESeq2_(FDR_0.01_FC_2)_regulated	Pfam_annotation	Swissprot_annotation	nr_annotation
c99259.graph_c2	5.99	6.92	9.84	32.38	28.46	35.93	2.41	4.69	4.07	3.3449e-09	1.73895	up	0.0637228	-0.745319	normal	E1-E2 ATPase;; Cation transporter/ATPase, N-terminus	Calcium-transporting ATPase 1, endoplasmic reticulum-type OS=Arabidopsis thaliana OX=3702 GN=ECA1 PE=1 SV=2	Calcium-transporting ATPase 1 [Symbiodinium microadriaticum]
c93582.graph_c0	0.3	0.81	0.71	1.44	1.95	5.41	0	0.06	0.21	0.000894862	1.28869	up	0.0528569	-0.722285	normal	Cation transporting ATPase, C-terminus	Calcium-transporting ATPase 10, plasma membrane-type OS=Arabidopsis thaliana OX=3702 GN=ACA10 PE=1 SV=2	hypothetical protein GUITHDRAFT_80735 [Guillardia theta CCMP2712]
c29254.graph_c0	2.99	3.8	3.88	2.64	4.68	1.19	11.51	12.66	14.63	0.81704	-0.123031	normal	0.000438787	1.16825	up	Bestrophin, RFP-TM, chloride channel	--	Calcium-transporting ATPase 1, endoplasmic reticulum-type [Symbiodinium microadriaticum]
c98508.graph_c1	8.44	6.34	10.91	3.46	5.22	5.93	21.54	17.73	19.64	0.0645982	-0.648322	normal	1.18566e-06	1.0659	up	Cation transporter/ATPase, N-terminus;; E1-E2 ATPase	ATPase 2, plasma membrane-type OS=Arabidopsis thaliana OX=3702 GN=AHA2 PE=1 SV=2	Calcium-transporting ATPase 1 [Symbiodinium microadriaticum]
c90975.graph_c0	36.26	41.54	36.02	93.88	64.22	79.41	32.08	38.78	31.13	3.63224e-11	1.00606	up	0.434839	-0.137787	normal	Calcium-dependent channel, 7TM region, putative phosphate	--	Uncharacterized protein RSN1, partial [Symbiodinium microadriaticum]
c100170.graph_c0	0.49	1.33	0.96	1.81	2.91	1.99	2.81	4.11	3.44	0.0723214	0.758312	normal	4.32963e-05	1.35285	up	--	--	Voltage-dependent calcium channel type A subunit alpha-1 [Symbiodinium microadriaticum]
c100170.graph_c1	1.21	1.09	1.17	0.7	1.16	0.74	2.6	2.43	3.05	0.492988	-0.320454	normal	2.41375e-05	1.10617	up	Ion transport protein	--	Voltage-dependent L-type calcium channel subunit alpha-1S [Symbiodinium microadriaticum]
c102566.graph_c7	3.3	3.8	3.54	5.44	4.98	3.2	9.4	9.41	8.18	0.547307	0.264828	normal	4.68329e-06	1.1583	up	EF hand;; EF hand;; EF-hand domain pair;; EF-hand domain;; EF-hand domain pair	--	Voltage-dependent T-type calcium channel subunit alpha-1G [Symbiodinium microadriaticum]
c28381.graph_c0	2.74	2.56	3.4	1.79	1.94	1.76	9.77	8.02	9.61	0.0766354	-0.576846	normal	1.72901e-19	1.61885	up	Ion transport protein;; EF-hand domain pair;; EF-hand domain;; EF hand	--	Voltage-dependent T-type calcium channel subunit alpha-1G [Symbiodinium microadriaticum]
c95027.graph_c0	0.38	0.47	0.39	0.73	1.07	0.96	2.66	2.2	2.5	0.0453326	0.778751	normal	1.52381e-18	2.21728	up	Ion transport protein;; EF-hand domain;; EF hand	--	putative voltage-dependent R-type calcium channel subunit alpha-1E [Symbiodinium microadriaticum]
c86149.graph_c0	3.13	2.67	2.97	7.91	10.78	31.08	0.44	2.79	6.61	3.96342e-06	1.647	up	0.982702	0.0119796	normal	EF hand;; EF-hand domain pair;; EF-hand domain pair;; EF-hand domain;; EF hand;; EF-hand domain;; Secreted protein acidic and rich in cysteine Ca binding region;; Cytoskeletal-regulatory complex EF hand	Calmodulin OS=Saccharina japonica OX=88149 GN=cam PE=2 SV=1	Calmodulin [Phytophthora nicotianae]
c101646.graph_c8	2.38	2.62	3.39	1.38	3.21	1.78	6.74	5.95	7.52	0.39837	-0.343077	normal	4.05566e-10	1.24474	up	EF-hand domain pair;; EF hand;; EF-hand domain pair;; EF-hand domain;; EF hand	Calmodulin OS=Euglena gracilis OX=3039 PE=1 SV=2	F-box/LRR-repeat protein 4 [Symbiodinium microadriaticum]
c45495.graph_c0	4.27	4.57	4.85	5.12	5.13	5.55	1.12	0.4	0.67	0.591329	0.159992	normal	2.17899e-13	-2.00254	down	EF hand	Calmodulin-like protein 1 OS=Oryza sativa subsp. japonica OX=39947 GN=CML1 PE=2 SV=1	calmodulin, partial [Phytophthora parasitica]
c95052.graph_c7	59.81	64.42	58.3	79.13	71.85	72.54	23.83	28.39	26.96	0.125894	0.181124	normal	3.47899e-44	-1.2373	down	--	--	Calcium-binding protein 1 [Symbiodinium microadriaticum]
c96692.graph_c0	2.25	3.18	3.31	0.66	2.5	2.23	0.85	0.39	1.21	0.179315	-0.587315	normal	0.00212327	-1.09506	down	EF-hand domain pair;; EF-hand domain;; EF hand;; EF-hand domain pair;; EF hand	Probable calcium-binding protein CML14 OS=Oryza sativa subsp. japonica OX=39947 GN=CML14 PE=2 SV=1	ef hand family protein [Chrysochromulina sp. CCMP291]
c106023.graph_c0	1.18	1.02	1.58	5.66	5.64	4.87	6.14	6.31	6.69	1.84867e-18	2.06685	up	2.63157e-05	1.01949	up	Protein kinase domain;; Protein tyrosine kinase	Casein kinase 1-like protein 11 OS=Arabidopsis thaliana OX=3702 GN=CKL11 PE=1 SV=1	PREDICTED: casein kinase I-like isoform X1 [Glycine max]
c31954.graph_c0	7.81	4.86	3.22	19.39	11.09	14.87	4.71	3.06	3.77	0.00167063	1.10737	up	0.403372	-0.38315	normal	--	--	CBL-interacting serine/threonine-protein kinase 24 [Symbiodinium microadriaticum]
c66508.graph_c2	17.38	15.48	14.46	41.67	30.19	30.35	12.75	11.94	10.03	3.90855e-06	1.0142	up	0.094392	-0.443333	normal	EF hand;; EF hand;; EF-hand domain pair;; EF-hand domain;; EF-hand domain pair;; Cytoskeletal-regulatory complex EF hand;; Secreted protein acidic and rich in cysteine Ca binding region	Calcium-dependent protein kinase 2 OS=Zea mays OX=4577 GN=CPK2 PE=2 SV=1	Calcium-dependent protein kinase 2, partial [Symbiodinium microadriaticum]
c49663.graph_c0	0.05	0.05	0.06	0.89	0.61	2.47	0.13	0.14	0	0.000301302	1.36765	up	0.786138	0.0835629	normal	Protein kinase domain;; Protein tyrosine kinase	Mitogen-activated protein kinase kinase 2 OS=Arabidopsis thaliana OX=3702 GN=MKK2 PE=1 SV=2	STE/STE7 protein kinase [Phytophthora palmivora var. palmivora]
c92619.graph_c0	0.11	0.12	0.07	0.25	0.86	2.49	0	0.07	0.04	0.000364857	1.37678	up	0.610226	-0.178893	normal	Protein kinase domain;; Protein tyrosine kinase	Serine/threonine-protein kinase MHK OS=Arabidopsis thaliana OX=3702 GN=MHK PE=2 SV=2	MAPK related serine/threonine protein kinase [Ectocarpus siliculosus]
c100506.graph_c0	4.78	4.89	4.38	1.81	1.9	2.6	7.44	8.79	6.04	3.60418e-06	-1.06609	down	7.76961e-06	0.73691	normal	Protein kinase domain;; Protein tyrosine kinase	Mitogen-activated protein kinase homolog NTF3 OS=Nicotiana tabacum OX=4097 GN=NTF3 PE=1 SV=1	Mitogen-activated protein kinase 2 [Symbiodinium microadriaticum]
c75020.graph_c0	6.75	5.97	6.74	2.43	2.67	2.9	7.06	5.83	6.59	1.1044e-11	-1.23399	down	0.575418	0.111218	normal	Protein kinase domain;; Protein tyrosine kinase	Serine/threonine-protein kinase CTR1 OS=Arabidopsis thaliana OX=3702 GN=CTR1 PE=1 SV=1	putative alpha-galactosidase [Symbiodinium microadriaticum]
c25445.graph_c0	1.91	2.18	2.18	1	0.45	0.44	1.98	1.92	1.68	0.000646442	-1.21951	down	0.890837	-0.0560153	normal	Protein kinase domain;; Protein tyrosine kinase;; ABC1 family	Serine/threonine-protein kinase TIO OS=Arabidopsis thaliana OX=3702 GN=TIO PE=1 SV=1	SNF1-like protein kinase ssp2 [Symbiodinium microadriaticum]
c102155.graph_c0	15.88	16.01	16.2	15.21	11.14	14.15	42.7	37.94	37.23	0.525758	-0.161833	normal	9.33928e-34	1.34214	up	Protein kinase domain;; Protein tyrosine kinase	Mitogen-activated protein kinase 4 OS=Oryza sativa subsp. japonica OX=39947 GN=MPK4 PE=2 SV=1	Mitogen-activated protein kinase 4 [Symbiodinium microadriaticum]
c45013.graph_c1	1.36	1	1	2.39	1.11	0.66	4.24	3.54	3.21	0.741892	0.166838	normal	5.89623e-07	1.41383	up	EF-hand domain;; EF hand;; EF-hand domain pair;; EF hand;; EF-hand domain pair;; Cytoskeletal-regulatory complex EF hand	Calcium-dependent protein kinase 12 OS=Oryza sativa subsp. japonica OX=39947 GN=CPK12 PE=2 SV=2	Calcium-dependent protein kinase 2 [Symbiodinium microadriaticum]
c113307.graph_c0	3.7	3.95	3.04	3.01	3.39	3.36	6.57	7.43	7.01	0.600227	-0.154963	normal	1.50476e-10	1.01935	up	--	--	Calcium/calmodulin-dependent protein kinase type 1B [Symbiodinium microadriaticum]
c84601.graph_c2	0.19	0.58	0.08	0.79	0.4	1.38	3.33	2.24	4.72	0.263919	0.490081	normal	1.41308e-08	1.94594	up	Protein kinase domain	Calcium-dependent protein kinase 22 OS=Oryza sativa subsp. japonica OX=39947 GN=CPK22 PE=3 SV=1	hypothetical protein RMCBS344292_01091 [Rhizopus microsporus]
c80082.graph_c2	1.29	1.44	1.34	0.9	0.73	1.07	6.75	4.58	7.01	0.27724	-0.457202	normal	1.65328e-20	2.00199	up	Protein kinase domain;; Protein tyrosine kinase	Serine/threonine-protein kinase PEPKR2 OS=Arabidopsis thaliana OX=3702 GN=PEPKR2 PE=2 SV=1	Calcium-dependent protein kinase 4 [Symbiodinium microadriaticum]
c57374.graph_c1	1.85	1.86	3.06	1.95	2.42	2.14	5.57	3.81	5.01	0.87488	-0.0689016	normal	3.34678e-05	1.02842	up	Protein kinase domain;; Protein tyrosine kinase	CBL-interacting protein kinase 4 OS=Oryza sativa subsp. japonica OX=39947 GN=CIPK4 PE=2 SV=2	Calcium-dependent protein kinase 1 [Symbiodinium microadriaticum]
c104511.graph_c0	22.61	28.37	27.08	28.58	28.23	23.22	40.86	50.19	44.44	0.671992	-0.0822831	normal	2.68442e-28	1.02816	up	Protein kinase domain;; Protein tyrosine kinase	Probable serine/threonine-protein kinase CCRP1 OS=Zea mays OX=4577 GN=CCRP1 PE=1 SV=1	Calcium-dependent protein kinase 16 [Symbiodinium microadriaticum]
c85892.graph_c1	1.08	1.38	1.18	0.71	1.39	1	2.46	3.06	2.34	0.656883	-0.197451	normal	5.42045e-05	1.03634	up	Protein kinase domain;; Protein tyrosine kinase;; Lipopolysaccharide kinase (Kdo/WaaP) family	CBL-interacting serine/threonine-protein kinase 18 OS=Arabidopsis thaliana OX=3702 GN=CIPK18 PE=1 SV=1	PREDICTED: CBL-interacting protein kinase 18-like [Fragaria vesca subsp. vesca]
c70295.graph_c0	4.79	4.5	5.2	3.25	2.95	3.75	11.67	10.54	8.49	0.0747998	-0.515151	normal	4.757e-09	1.06276	up	Protein kinase domain;; Protein tyrosine kinase	Serine/threonine-protein kinase Nek2 OS=Oryza sativa subsp. indica OX=39946 GN=NEK2 PE=3 SV=1	Serine/threonine-protein kinase Nek1 [Symbiodinium microadriaticum]
c24727.graph_c0	2.01	2.19	1.89	1.84	4.14	3.89	5.87	5.93	7.58	0.1578	0.520183	normal	6.28762e-13	1.52665	up	Protein kinase domain;; Protein tyrosine kinase;; Kinase-like	Mitogen-activated protein kinase kinase kinase 3 OS=Arabidopsis thaliana OX=3702 GN=MAPKKK3 PE=1 SV=1	Mitogen-activated protein kinase kinase kinase A [Symbiodinium microadriaticum]
c91202.graph_c0	3.33	2.94	3.69	2.19	3.2	2.98	8.1	6.86	7.86	0.452358	-0.252368	normal	5.02192e-13	1.21909	up	Protein kinase domain;; Protein tyrosine kinase;; Kinase-like;; Lipopolysaccharide kinase (Kdo/WaaP) family	Serine/threonine-protein kinase AtPK2/AtPK19 OS=Arabidopsis thaliana OX=3702 GN=ATPK2 PE=1 SV=2	CBL-interacting protein kinase 31 [Symbiodinium microadriaticum]
c97991.graph_c0	4.78	3.56	4.41	2.88	4.47	6.26	7.83	11.91	7.85	0.888278	-0.0502023	normal	1.31189e-16	1.2183	up	Protein kinase domain;; Protein tyrosine kinase	Casein kinase 1-like protein 5 OS=Arabidopsis thaliana OX=3702 GN=CKL5 PE=1 SV=1	ser/thr kinase, partial [Coccomyxa subellipsoidea C-169]
c93255.graph_c0	0.94	1	0.95	0.73	0.33	0.86	3.49	3.02	3.43	0.355679	-0.423361	normal	3.31313e-13	1.64676	up	Protein kinase domain;; Protein tyrosine kinase	Serine/threonine-protein kinase PEPKR2 OS=Arabidopsis thaliana OX=3702 GN=PEPKR2 PE=2 SV=1	Aflatoxin B1 aldehyde reductase member 4 [Symbiodinium microadriaticum]
c104958.graph_c0	0.92	0.87	1.01	0.65	1.01	0.8	2.98	2.84	2.33	0.714826	-0.165097	normal	1.61758e-09	1.43255	up	Protein kinase domain;; Protein tyrosine kinase	CBL-interacting serine/threonine-protein kinase 20 OS=Arabidopsis thaliana OX=3702 GN=CIPK20 PE=1 SV=1	CAMK/CAMK1 protein kinase [Mucor ambiguus]
c74885.graph_c0	4.33	4.59	4.28	4.12	3.82	3.84	1.65	1.32	1.27	0.397957	-0.193566	normal	4.364e-15	-1.39754	down	Protein kinase domain;; Protein tyrosine kinase	Serine/threonine-protein kinase ATG1a OS=Arabidopsis thaliana OX=3702 GN=ATG1A PE=1 SV=1	Calcium-dependent protein kinase 1 [Symbiodinium microadriaticum]
c44988.graph_c0	3.75	4.99	3.72	4.03	2.68	3.18	2.21	0.66	1.36	0.494584	-0.27934	normal	0.000944752	-1.08169	down	Protein kinase domain;; Protein tyrosine kinase	CBL-interacting serine/threonine-protein kinase 23 OS=Arabidopsis thaliana OX=3702 GN=CIPK23 PE=1 SV=1	serine/threonine protein kinase [Galdieria sulphuraria]
c86473.graph_c0	1.07	1.21	1.83	1	1.31	1.18	0.09	0	0	0.638985	-0.202862	normal	3.32635e-12	-2.35248	down	Protein kinase domain;; Protein tyrosine kinase;; EF hand;; EF-hand domain;; EF-hand domain pair;; EF hand;; EF-hand domain pair;; Cytoskeletal-regulatory complex EF hand	Calcium-dependent protein kinase 19 OS=Arabidopsis thaliana OX=3702 GN=CPK19 PE=2 SV=1	Calcium-dependent protein kinase 2 [Symbiodinium microadriaticum]
c74739.graph_c0	3.7	3.62	3.17	4.06	4.21	4.45	0.52	1.36	1.17	0.807573	-0.0836139	normal	7.24291e-08	-1.46956	down	--	--	Calcium-dependent protein kinase 2 [Symbiodinium microadriaticum]
c89177.graph_c1	2.26	2.21	1.81	1.93	3.74	1.8	0.61	0.25	0.07	0.73225	0.157629	normal	3.19633e-05	-1.46908	down	EF hand;; EF hand;; EF-hand domain;; EF-hand domain pair;; Protein kinase domain;; EF-hand domain pair;; Secreted protein acidic and rich in cysteine Ca binding region;; Protein tyrosine kinase	Calcium-dependent protein kinase 3 OS=Arabidopsis thaliana OX=3702 GN=CPK3 PE=1 SV=1	BnaA03g46140D [Brassica napus]
c98896.graph_c0	4.79	5.72	4.86	3.64	3.93	4.55	3.32	2.57	1.3	0.259602	-0.374734	normal	0.000108125	-1.03463	down	Protein kinase domain;; Protein tyrosine kinase	Proline-rich receptor-like protein kinase PERK14 OS=Arabidopsis thaliana OX=3702 GN=PERK14 PE=2 SV=1	Calcium-dependent protein kinase 13 [Symbiodinium microadriaticum]
c93022.graph_c0	5.11	5.96	4.49	3.56	3.15	3.71	2.06	2.1	1.47	0.0446918	-0.56625	normal	1.84933e-06	-1.16133	down	Protein kinase domain;; Protein tyrosine kinase	CBL-interacting protein kinase 31 OS=Oryza sativa subsp. japonica OX=39947 GN=CIPK31 PE=1 SV=1	Calcium-dependent protein kinase 2 [Symbiodinium microadriaticum]
c84239.graph_c0	0.73	0.61	0.79	1.65	1.77	5.89	0.07	0.92	0.62	0.00253906	1.1881	up	0.769361	-0.147156	normal	Ras family;; Ras of Complex, Roc, domain of DAPkinase;; ADP-ribosylation factor family;; RNA helicase	GTP-binding nuclear protein Ran-3 OS=Arabidopsis thaliana OX=3702 GN=RAN3 PE=1 SV=2	ras-domain-containing protein [Fragilariopsis cylindrus CCMP1102]
c65055.graph_c1	9.49	10.66	10.94	13.43	9.97	8.46	19.68	24.39	27.17	0.929785	0.0347764	normal	2.27339e-08	1.07902	up	Ras family;; Ras of Complex, Roc, domain of DAPkinase;; ADP-ribosylation factor family;; Gtr1/RagA G protein conserved region;; 50S ribosome-binding GTPase	Ras-related protein RIC2 OS=Oryza sativa subsp. japonica OX=39947 GN=RIC2 PE=2 SV=2	Ras-related protein YPTC6 [Symbiodinium microadriaticum]
c79089.graph_c0	0.57	0.89	0.62	1.16	1.2	0.33	1.78	1.66	2.26	0.738852	0.172225	normal	0.00341008	1.0274	up	ADP-ribosylation factor family;; Signal recognition particle receptor beta subunit;; Ras family;; Ras of Complex, Roc, domain of DAPkinase;; 50S ribosome-binding GTPase	GTP-binding protein SAR2 OS=Solanum lycopersicum OX=4081 GN=SAR2 PE=2 SV=1	GTP-binding protein SAR1A [Symbiodinium microadriaticum]
c35553.graph_c0	3.08	3.28	2.73	2.27	2.45	2.47	1.37	1.11	0.91	0.0616045	-0.361478	normal	7.04261e-12	-1.19415	down	RNA ligase;; AAA domain;; 3'-5' exonuclease;; R3H domain	--	GTP-binding protein [Emiliania huxleyi CCMP1516]
c80884.graph_c0	1.75	2.1	3.25	5.34	12.66	20.22	0.61	1.49	2.06	0.00100966	1.28736	up	0.224347	-0.490003	normal	WD domain, G-beta repeat;; Anaphase-promoting complex subunit 4 WD40 domain	Guanine nucleotide-binding protein subunit beta-like protein OS=Chlamydomonas reinhardtii OX=3055 GN=GBLP PE=2 SV=1	hypothetical protein AURANDRAFT_37768 [Aureococcus anophagefferens]
c85439.graph_c0	0.36	0.37	0.32	0.68	1.46	2.92	0.05	0	0.18	0.00300221	1.1797	up	0.170009	-0.52309	normal	G-protein alpha subunit;; ADP-ribosylation factor family	Guanine nucleotide-binding protein alpha-1 subunit OS=Arabidopsis thaliana OX=3702 GN=GPA1 PE=1 SV=1	G protein alpha subunit putative [Albugo laibachii Nc14]
c94125.graph_c0	0.54	0.59	0.48	1.06	1.76	4.69	0.07	0.18	0.08	0.000218666	1.37688	up	0.0198219	-0.901261	normal	Phosphoesterase family	Non-specific phospholipase C6 OS=Arabidopsis thaliana OX=3702 GN=NPC6 PE=2 SV=1	PREDICTED: non-specific phospholipase C2-like [Lupinus angustifolius]
c86675.graph_c0	2.65	2.4	2.73	5.79	8.6	5.59	1.85	1.76	1.63	0.000147971	1.10432	up	0.324351	-0.38551	normal	DnaJ domain	DnaJ protein homolog 2 OS=Allium porrum OX=4681 GN=LDJ2 PE=2 SV=1	Phosphatidylinositol 4-phosphate 5-kinase 4 [Symbiodinium microadriaticum]
c101487.graph_c0	11.72	13.19	15.94	6.47	10.23	13.99	29.95	28.67	32	0.313829	-0.351141	normal	2.87635e-10	1.07279	up	MORN repeat	Flagellar radial spoke protein 1 OS=Chlamydomonas reinhardtii OX=3055 GN=RSP1 PE=1 SV=1	Phosphatidylinositol 4-phosphate 5-kinase 6 [Symbiodinium microadriaticum]
c85462.graph_c0	2.15	2.22	1.95	1.89	2.37	1.81	0.68	0.88	0.72	0.844908	-0.0798478	normal	0.000399808	-1.0701	down	Transferase family	--	Phosphatidylinositol 4-phosphate 5-kinase-like protein 1 [Symbiodinium microadriaticum]
c104049.graph_c0	2.79	2.37	2.87	2.67	3.52	3.1	15.41	14.16	13.32	0.763629	0.101677	normal	2.74848e-50	2.1838	up	Leucine rich repeat;; Leucine Rich repeats (2 copies)	Receptor-like protein kinase 2 OS=Arabidopsis thaliana OX=3702 GN=RCH2 PE=1 SV=1	leucine-rich repeat receptor protein kinase EMS1 [Carica papaya]
c57545.graph_c0	1.36	1.37	1.47	1.48	1.09	1.41	3.93	2.92	2.88	0.834949	-0.0843007	normal	4.93931e-11	1.38293	up	Concanavalin A-like lectin/glucanases superfamily;; Putative ephrin-receptor like	--	Tetrathionate sensor histidine kinase TtrS [Symbiodinium microadriaticum]
