# Supplementary material for: Transcriptome and metabolome analyses of cold and darkness-induced pellicle cysts of Scrippsiella trochoidea
Source: BMC Genomics. 2021 Jul 10;22:526. doi: 10.1186/s12864-021-07840-7 (PMC8272339; doi:10.1186/s12864-021-07840-7)
Supplement: Supplementary file 9 — Additional file 9: Supplementary Table S9 Differentially expressed genes involved in cell cycle in pellicle cysts. [file 12864_2021_7840_MOESM9_ESM.xlsx]

## Sheet: Sheet1
Additional file 9 Differentially expressed genes involved in cell cycle in pellicle cysts
#ID	CK1_FPKM	CK2_FPKM	CK3_FPKM	PC1_FPKM	PC2_FPKM	PC3_FPKM	FDR	log2FC	regulated	Pfam_annotation	Swissprot_annotation	nr_annotation
c44162.graph_c0	5.99	6.71	6.83	1.6	1.55	1.8	2.84841e-16	-1.70076	down	--	Cyclin-dependent kinase F-4 OS=Oryza sativa subsp. japonica OX=39947 GN=CDKF-4 PE=2 SV=1	PREDICTED: serine/threonine-protein kinase ATG1t-like [Pyrus x bretschneideri]
c46114.graph_c2	8.26	14.35	9.08	0.4	0.43	0.96	2.03354e-08	-1.94541	down	Protein kinase domain;; Protein tyrosine kinase	Cyclin-dependent kinase A-1 OS=Arabidopsis thaliana OX=3702 GN=CDKA-1 PE=1 SV=1	hypothetical protein GUITHDRAFT_69171 [Guillardia theta CCMP2712]
c101407.graph_c0	8.13	20.76	23.42	4.08	3.97	3.3	1.15874e-09	-1.71934	down	Cyclin, N-terminal domain;; Cyclin, C-terminal domain	Cyclin-B2-4 OS=Arabidopsis thaliana OX=3702 GN=CYCB2-4 PE=2 SV=2	cyclin B [Alexandrium fundyense]
c103194.graph_c0	1.64	1.32	0.96	0.31	0.13	0.22	1.24654e-06	-1.60443	down	Cyclin, C-terminal domain;; Leucine Rich repeat;; Cyclin, N-terminal domain	Cyclin-B2-2 OS=Oryza sativa subsp. japonica OX=39947 GN=CYCB2-2 PE=1 SV=1	G2/mitotic-specific cyclin-2-like [Dendrobium catenatum]
c84613.graph_c1	4.07	5.57	6.58	1.64	2.46	1.86	0.00015497	-1.10191	down	Cyclin	Cyclin-U2-2 OS=Arabidopsis thaliana OX=3702 GN=CYCU2-2 PE=1 SV=1	putative cyclin-like protein [Symbiodinium microadriaticum]
c45848.graph_c1	7.44	7.94	7.5	4.03	2.62	1.91	2.1127e-08	-1.17302	down	ATPase family associated with various cellular activities (AAA);; Holliday junction DNA helicase ruvB N-terminus;; AAA ATPase domain;; AAA domain;; AAA domain (Cdc48 subfamily);; AAA domain (dynein-related subfamily);; AAA domain;; AAA domain;; TIP49 C-terminus;; RNA helicase;; AAA domain;; Viral (Superfamily 1) RNA helicase;; Bacterial dnaA protein;; Magnesium chelatase, subunit ChlI;; IstB-like…	Cell division cycle protein 48 homolog OS=Glycine max OX=3847 GN=CDC48 PE=2 SV=1	Cell division cycle protein 48-like [Symbiodinium microadriaticum]
c125830.graph_c0	0.09	0	0.08	1.3	2.01	0.98	6.11254e-10	2.12643	up	RNA recognition motif 2;; RNA recognition motif. (a.k.a. RRM, RBD, or RNP domain)	Protein MEI2-like 3 OS=Oryza sativa subsp. japonica OX=39947 GN=ML3 PE=2 SV=2	protein terminal ear1-like [Helianthus annuus]
c90371.graph_c1	1.3	1.54	1.83	3.29	4.61	3.16	0.000123055	1.08083	up	RNA recognition motif 2	Protein MEI2-like 4 OS=Oryza sativa subsp. japonica OX=39947 GN=ML4 PE=2 SV=1	Protein terminal ear1-like [Symbiodinium microadriaticum]
c92776.graph_c1	1.61	1.41	1.03	7.82	8.8	10.82	5.3083e-21	2.36302	up	RNA recognition motif 2;; Smg-4/UPF3 family	Protein MEI2-like 7 OS=Oryza sativa subsp. japonica OX=39947 GN=OML7 PE=2 SV=1	Protein terminal ear1-like [Symbiodinium microadriaticum]
c78210.graph_c0	0.25	0.07	0.24	5.17	3.47	3.35	3.83673e-13	2.40627	up	RNA recognition motif 2	Protein MEI2-like 3 OS=Oryza sativa subsp. japonica OX=39947 GN=ML3 PE=2 SV=2	Protein MEI2-like 3 [Symbiodinium microadriaticum]
c61839.graph_c0	0.25	0.23	0.06	1.94	1.93	1.71	1.86607e-06	1.6792	up	RNA recognition motif 2	Protein terminal ear1 OS=Zea mays OX=4577 GN=TE1 PE=2 SV=1	Protein MEI2-like 5 [Symbiodinium microadriaticum]
c126883.graph_c0	0.2	0.08	0	1.29	0.82	2.36	0.00051801	1.23952	up	RNA recognition motif 2;; RNA recognition motif. (a.k.a. RRM, RBD, or RNP domain)	--	Protein MEI2-like 5 [Symbiodinium microadriaticum]
c75274.graph_c0	0.43	0.33	0.36	2.88	3.3	3.96	1.71321e-25	2.64778	up	RNA recognition motif. (a.k.a. RRM, RBD, or RNP domain);; RNA recognition motif 2	Protein MEI2-like 5 OS=Arabidopsis thaliana OX=3702 GN=ML5 PE=1 SV=1	Protein MEI2-like 5 [Symbiodinium microadriaticum]
c88011.graph_c0	2.3	2	2.67	4.59	4.06	6.59	7.76816e-06	1.06196	up	RNA recognition motif. (a.k.a. RRM, RBD, or RNP domain);; RNA recognition motif 2	--	Protein MEI2-like 5 [Symbiodinium microadriaticum]
c48726.graph_c0	0.56	1.16	0.61	2.74	2.98	2.82	1.06888e-06	1.47732	up	Zinc finger C-x8-C-x5-C-x3-H type (and similar)	--	Protein MEI2-like 2 [Symbiodinium microadriaticum]
c101817.graph_c0	4.04	3.89	4.86	1.63	2.07	1.77	7.7694e-06	-1.0355	down	RNA recognition motif 2	Protein MEI2-like 5 OS=Oryza sativa subsp. japonica OX=39947 GN=ML5 PE=2 SV=1	Protein MEI2-like 3 [Symbiodinium microadriaticum]
c104282.graph_c0	1.4	1.51	1.54	5.19	4.08	4.78	4.65148e-26	1.67512	up	RecF/RecN/SMC N terminal domain;; SMC proteins Flexible Hinge Domain;; AAA domain;; AAA domain, putative AbiEii toxin, Type IV TA system;; AAA ATPase domain	Structural maintenance of chromosomes protein 3 OS=Arabidopsis thaliana OX=3702 GN=SMC3 PE=2 SV=1	Structural maintenance of chromosomes protein 3 [Symbiodinium microadriaticum]
